# Supplementary material
Source: PubMed Central journal article supplement (PMC3059437)
Supplement: NIHMS247040-supplement-1.pdf [file NIHMS247040-supplement-1.pdf]

**Supporting Material for**

**Folate-Dependent Thymidylate Synthesis Capacity Modifies *Apc<sup>min</sup>*-Mediated Intestinal Cancer Risk in Mice**

Amanda J. MacFarlane,<sup>1#</sup> Cheryll A. Perry,<sup>1</sup> Michael F. McEntee,<sup>2</sup> David M. Lin,<sup>3</sup> and Patrick J. Stover<sup>1\*</sup>

<sup>1</sup> Division of Nutritional Sciences, Cornell University, 127 Savage Hall, Ithaca, NY, 14853, USA.

<sup>2</sup> Department of Pathobiology, College of Veterinary Medicine, University of Tennessee, 2407 River Drive, Knoxville, TN, 37996, USA.

<sup>3</sup> Department of Biomedical Sciences, Cornell University, T2-006A Veterinary Research Tower, Ithaca, NY, 14853, USA.

# Current address: Nutrition Research Division, Food Directorate, Health Products and Food Branch, Health Canada, Ottawa, ON, K1A 0K9, Canada

**Includes:**

Tables S1-S2

## Supporting Tables

**Table S1. *Shmt1*-mediated changes in gene expression in colon tissue from mice fed the folate and choline deficient diet for five weeks were evaluated by microarray analysis.**

Predicted increases and decreases in gene expression are shown as *Shmt1*<sup>-/+</sup> relative to *Shmt1*<sup>+/+</sup> or *Shmt1*<sup>-/-</sup> relative to *Shmt1*<sup>+/+</sup>. Of the genes predicted to have increased or decreased expression in response to *Shmt1* expression, nine were selected to be assessed by qRT-PCR (in bold, also see Table S4). However, only one gene tested (*Upp*) showed consistent differences in expression between mutant and wildtype animals. The microarray data presented in this publication have been deposited in NCBI's Gene Expression Omnibus (1) and are accessible through GEO Series accession number GSE14645.

| ID           | Gene          | $\log_2(\text{Shmt1}^{-/+}/\text{Shmt1}^{+/+})$ | $\log_2(\text{Shmt1}^{-/+}/\text{Shmt1}^{+/+})$ |
|--------------|---------------|-------------------------------------------------|-------------------------------------------------|
| 1453887_a_at | <b>Tiam1</b>  | 0.922                                           | 0.628                                           |
| 1456134_x_at | <b>Yif1</b>   | 0.809                                           | 2.004                                           |
| 1427344_s_at | Rasd2         | 0.793                                           | -0.469                                          |
| 1460004_x_at | Stx6          | 0.792                                           | 0.669                                           |
| 1448232_x_at | <b>Tuba6</b>  | 0.775                                           | 1.175                                           |
| 1427161_at   | Cenpf         | 0.752                                           | 0.016                                           |
| 1460735_at   | Svil          | 0.714                                           | 0.397                                           |
| 1455788_x_at |               | 0.683                                           | 0.787                                           |
| 1425318_a_at | C030022K24Rik | 0.667                                           | 0.337                                           |
| 1439377_x_at | <b>Cdc20</b>  | 0.660                                           | 0.106                                           |
| 1449237_at   | Aloxe3        | 0.648                                           | 0.853                                           |
| 1421072_at   | Irx5          | 0.623                                           | 0.631                                           |
| 1439167_at   | Pecr          | 0.606                                           | 0.772                                           |
| 1449264_at   | Syt11         | 0.550                                           | 0.876                                           |
| 1426294_at   | Hapln1        | 0.548                                           | 0.374                                           |
| 1438006_at   | 4933439F18Rik | 0.545                                           | 0.312                                           |
| 1448723_at   | Rdh7          | 0.541                                           | 0.202                                           |
| 1450659_at   | Rgs7          | 0.537                                           | 0.366                                           |
| 1436862_at   | Doc2a         | 0.532                                           | 0.151                                           |
| 1437974_a_at | Hk1           | 0.511                                           | 0.106                                           |
| 1447926_at   | Arl5          | 0.509                                           | 0.292                                           |
| 1424010_at   | Mfap4         | 0.508                                           | -0.301                                          |
| 1437526_x_at | Hnrpr         | 0.494                                           | 0.600                                           |

|              |                 |       |        |
|--------------|-----------------|-------|--------|
| 1427066_a_at | 4933439F18Rik   | 0.489 | 0.355  |
| 1420667_at   | Doc2b           | 0.470 | 0.257  |
| 1450591_at   | Olfrl54         | 0.463 | 0.417  |
| 1449075_at   | 4930539P14Rik   | 0.462 | 0.419  |
| 1428586_at   | D7Erttd743e     | 0.460 | 0.727  |
| 1436236_x_at |                 | 0.455 | 0.178  |
| 1450920_at   | Ccnb2           | 0.454 | 0.166  |
| 1417853_at   | Clca1 /// Clca2 | 0.453 | 0.408  |
| 1451898_a_at | Sema6c          | 0.440 | 0.267  |
| 1437338_x_at |                 | 0.439 | 0.405  |
| 1438973_x_at | Gjal            | 0.433 | 0.578  |
| 1437837_x_at | Poldip3         | 0.424 | 0.713  |
| 1437463_x_at | Tgfb1           | 0.417 | 0.655  |
| 1426470_at   | Tbp             | 0.415 | 0.752  |
| 1427509_at   |                 | 0.413 | 0.325  |
| 1416839_at   | Mut             | 0.405 | 0.208  |
| 1456100_at   | LOC280621       | 0.399 | -0.266 |
| 1451830_a_at | Spnb2           | 0.395 | 0.084  |
| 1417547_at   | Sart3           | 0.393 | 0.055  |
| 1421922_at   |                 | 0.392 | 0.071  |
| 1456250_x_at | Tgfb1           | 0.379 | 0.676  |
| 1438534_x_at | BC004004        | 0.377 | 0.512  |
| 1424844_at   | 1110030H02Rik   | 0.371 | 0.188  |
| 1425184_at   | 2810433K01Rik   | 0.366 | 0.709  |
| 1433909_at   | Bk              | 0.361 | 0.271  |
| 1420757_at   | Myf5            | 0.360 | 0.504  |
| 1439382_x_at | Ddr1            | 0.355 | 0.910  |
| 1452477_at   | 3110057O12Rik   | 0.349 | 0.286  |
| 1449864_at   | Il4             | 0.345 | 0.684  |
| 1434599_a_at | Tjp2            | 0.344 | 0.015  |
| 1456013_x_at | Slc35a4         | 0.343 | 0.143  |
| 1455232_at   | Cml2            | 0.341 | 0.641  |
| 1424611_x_at | Trub2           | 0.339 | 0.083  |
| 1449251_at   | Ndph            | 0.335 | 0.847  |
| 1434589_x_at | Surf4           | 0.333 | 0.268  |
| 1422101_at   | Tnfrsf23        | 0.331 | 0.935  |
| 1426810_at   | Jmjd1a          | 0.329 | 0.295  |
| 1450941_at   |                 | 0.326 | 0.441  |
| 1456730_x_at |                 | 0.322 | 0.269  |
| 1425038_at   | Slc22a19        | 0.319 | 0.018  |
| 1437035_x_at | Rnf14           | 0.317 | 0.283  |
| 1418890_a_at | Rab3d           | 0.316 | 0.020  |
| 1450630_at   | Qtrt1           | 0.316 | 0.305  |
| 1427948_a_at | Zfp99           | 0.315 | 0.561  |
| 1434134_at   | Wdr42a          | 0.312 | 0.335  |
| 1449076_x_at | AL024210        | 0.308 | 0.684  |

|              |                           |       |        |
|--------------|---------------------------|-------|--------|
| 1460364_at   |                           | 0.307 | 0.168  |
| 1416265_at   | Capn10                    | 0.296 | -0.090 |
| 1422412_x_at | Ear3                      | 0.295 | 1.165  |
| 1451566_at   | BC005471                  | 0.292 | 0.086  |
| 1424117_at   | BC056474                  | 0.290 | 0.248  |
| 1422816_a_at | Mutyh                     | 0.289 | -0.037 |
| 1420883_at   | Sln                       | 0.287 | -0.001 |
| 1425448_x_at | Atp6v0b                   | 0.285 | 0.511  |
| 1460672_at   | 2410002F23Rik             | 0.281 | 0.404  |
| 1456598_at   | D5Erttd577e /// LOC433920 | 0.279 | 0.544  |
| 1429043_at   | Smndc1                    | 0.278 | 0.385  |
| 1448814_at   | Gab1                      | 0.277 | 0.629  |
| 1451044_at   | Sip1                      | 0.277 | 0.223  |
| 1451453_at   | Dapk2                     | 0.277 | -0.226 |
| 1451872_a_at | Neurl                     | 0.276 | 0.347  |
| 1419817_s_at | D1Erttd161e               | 0.273 | 0.368  |
| 1424836_a_at | Clasp2                    | 0.273 | 0.276  |
| 1454838_s_at | AW548124                  | 0.272 | 0.597  |
| 1455941_s_at | Map2k5                    | 0.270 | 0.173  |
| 1451522_s_at | Lrch4                     | 0.269 | 0.355  |
| 1420083_at   |                           | 0.269 | 0.380  |
| 1455747_at   | Ggta1                     | 0.267 | 0.318  |
| 1424012_at   | 4930506L13Rik             | 0.266 | 0.249  |
| 1427983_at   | Suhw3                     | 0.264 | 0.439  |
| 1427129_a_at | Hnrpr                     | 0.264 | 0.187  |
| 1438250_s_at | Taf9                      | 0.262 | 0.286  |
| 1448002_x_at | 2610001J05Rik             | 0.261 | 0.299  |
| 1456534_at   |                           | 0.259 | 0.239  |
| 1422659_at   | Camk2d                    | 0.253 | 0.104  |
| 1416987_at   | Elp4                      | 0.253 | 0.468  |
| 1426595_at   | Slc18a1                   | 0.248 | 0.422  |
| 1437341_x_at | Cnp1                      | 0.245 | 0.009  |
| 1455731_at   | Slc29a3                   | 0.244 | 0.112  |
| 1423278_at   | Ptprk                     | 0.237 | 0.168  |
| 1422050_at   | Nkx1-2                    | 0.234 | 0.480  |
| 1420483_at   | <b>Cnmm3</b>              | 0.231 | 0.761  |
| 1417274_at   | Snrpa                     | 0.224 | -0.041 |
| 1424238_at   | Sirt7                     | 0.223 | 0.118  |
| 1456462_x_at | Ppp1cb                    | 0.220 | 0.558  |
| 1415898_at   | Mgst1                     | 0.209 | 0.260  |
| 1454604_s_at | Tm4sf12                   | 0.209 | 0.548  |
| 1425486_s_at | Mtmr6                     | 0.205 | 0.227  |
| 1436242_a_at | Cklf                      | 0.205 | 0.152  |
| 1426856_at   |                           | 0.202 | 0.535  |
| 1420741_x_at | 2310069N01Rik             | 0.202 | 0.450  |
| 1418152_at   | Nsbp1                     | 0.199 | 0.222  |

|              |               |       |        |
|--------------|---------------|-------|--------|
| 1426840_at   | Ythdf3        | 0.196 | 0.307  |
| 1438415_s_at | 1300010K09Rik | 0.191 | 0.263  |
| 1426208_x_at | Plag1         | 0.183 | 0.371  |
| 1448672_a_at | Zfp289        | 0.175 | 0.059  |
| 1428772_at   | Xpot          | 0.173 | -0.261 |
| 1423948_at   | Bag2          | 0.170 | -0.741 |
| 1425198_at   | Ptpn2         | 0.166 | 0.609  |
| 1434510_at   | 1810018P12Rik | 0.165 | 0.129  |
| 1419154_at   | Tmprss2       | 0.165 | -0.188 |
| 1434515_at   | Ncoa1         | 0.164 | 0.346  |
| 1452243_at   | Kcnj14        | 0.162 | -0.624 |
| 1418068_at   |               | 0.161 | -0.664 |
| 1438511_a_at | 1190002H23Rik | 0.160 | 0.647  |
| 1416832_at   | Slc39a8       | 0.160 | 0.377  |
| 1429491_s_at | Rif1          | 0.159 | 0.277  |
| 1419945_s_at | Rab2          | 0.156 | 0.203  |
| 1448461_a_at | 1500006O09Rik | 0.152 | 0.193  |
| 1438992_x_at | Atf4          | 0.151 | 0.543  |
| 1450765_a_at | Pde6h         | 0.149 | 0.599  |
| 1426728_x_at | Ptdss2        | 0.149 | 0.231  |
| 1428585_at   | Actn1         | 0.146 | 0.003  |
| 1437724_x_at | Pitpnm1       | 0.146 | 0.211  |
| 1455912_x_at |               | 0.145 | 0.156  |
| 1426593_a_at | Fbxo22        | 0.144 | 0.403  |
| 1421228_at   | Ccl7          | 0.143 | 0.780  |
| 1417404_at   | Elovl6        | 0.143 | -0.268 |
| 1433527_at   | Ireb2         | 0.138 | 0.289  |
| 1437290_at   | 1110001C20Rik | 0.134 | 0.152  |
| 1434148_at   | Tcf4          | 0.134 | 0.216  |
| 1451070_at   | Gdi1          | 0.129 | -0.071 |
| 1424458_at   | Jmjd2c        | 0.127 | 0.279  |
| 1460228_at   | Usf2          | 0.127 | 0.467  |
| 1420618_at   | Cpeb4         | 0.127 | 0.298  |
| 1425680_a_at | Btrc          | 0.126 | 0.027  |
| 1415800_at   | Gjal          | 0.125 | 0.328  |
| 1424850_at   | Map3k1        | 0.125 | 0.211  |
| 1453207_at   | Pcp2          | 0.121 | 0.109  |
| 1453198_at   | MGI:3028594   | 0.111 | 0.469  |
| 1428988_at   | Abcc3         | 0.110 | -0.029 |
| 1451993_at   | 9130404D08Rik | 0.108 | 0.522  |
| 1424211_at   | 5730438N18Rik | 0.106 | 0.412  |
| 1456195_x_at | Itgb5         | 0.106 | -0.263 |
| 1415688_at   | Ube2g1        | 0.103 | 0.280  |
| 1452007_at   | Sybl1         | 0.101 | 0.257  |
| 1417719_at   | Sap30         | 0.100 | -0.257 |
| 1428099_a_at | Sfrs1         | 0.097 | 0.225  |

|              |               |        |        |
|--------------|---------------|--------|--------|
| 1460217_at   | Plfr          | 0.096  | 0.392  |
| 1429620_at   | 8430406I07Rik | 0.094  | 0.610  |
| 1448101_s_at | Trim27        | 0.093  | 0.260  |
| 1451526_at   | Arhgap12      | 0.090  | 0.245  |
| 1452291_at   | Centd1        | 0.089  | 0.234  |
| 1427949_at   | Zfp294        | 0.086  | 0.312  |
| 1425516_at   | Ogt           | 0.086  | 0.223  |
| 1429568_x_at | 2510010F15Rik | 0.083  | -0.214 |
| 1423458_at   | Slc35a5       | 0.080  | 0.348  |
| 1436900_x_at | Leprot        | 0.079  | 0.158  |
| 1437302_at   | Adrb2         | 0.078  | 0.665  |
| 1434121_at   | Lgi4          | 0.072  | 0.257  |
| 1428094_at   | Lamp2         | 0.071  | 0.324  |
| 1454738_x_at | Pex6          | 0.070  | -0.164 |
| 1438808_at   |               | 0.065  | 0.649  |
| 1455932_at   |               | 0.060  | 0.322  |
| 1423902_s_at | Arhgef12      | 0.055  | 0.218  |
| 1450128_at   | Pla2g2a       | 0.053  | -0.289 |
| 1449334_at   | Timp3         | 0.051  | 0.629  |
| 1422912_at   | Bmp4          | 0.049  | 0.276  |
| 1448658_at   | Sart1         | 0.048  | -0.347 |
| 1450136_at   | Cd38          | 0.038  | 0.463  |
| 1452735_at   | Pcnp          | 0.037  | 0.116  |
| 1422278_at   | Drd3          | 0.037  | 0.367  |
| 1460634_at   | Ralgds        | 0.037  | -0.340 |
| 1437687_x_at | Fkbp9         | 0.037  | -0.338 |
| 1425725_s_at | Ppp2r5c       | 0.035  | 0.438  |
| 1426873_s_at | Jup           | 0.026  | 0.122  |
| 1419089_at   | Timp3         | 0.020  | 0.494  |
| 1417751_at   | Stk10         | 0.012  | -0.222 |
| 1416458_at   | Arf2          | 0.012  | -0.209 |
| 1426462_at   | Gphn          | 0.012  | -0.212 |
| 1417917_at   | Cnn1          | 0.006  | -0.641 |
| 1429643_a_at | Pde1c         | 0.003  | 0.214  |
| 1417272_at   | 9130005N14Rik | 0.000  | -0.285 |
| 1420549_at   | Gbp1          | -0.003 | -0.551 |
| 1421877_at   | Mapk9         | -0.012 | -0.320 |
| 1424373_at   | Armcx3        | -0.016 | -0.235 |
| 1419063_at   | Ugt8          | -0.018 | 0.676  |
| 1428319_at   | Pdlim7        | -0.020 | -0.498 |
| 1448406_at   | Cri1          | -0.024 | 0.273  |
| 1419138_at   | B3galt4       | -0.027 | -0.180 |
| 1426043_a_at | Capn3         | -0.027 | -0.368 |
| 1450269_a_at | Pfkl          | -0.031 | -0.284 |
| 1454670_at   | Rere          | -0.031 | 0.189  |
| 1417698_at   | Gtf2f1        | -0.033 | -0.222 |

|              |                                                                                    |        |        |
|--------------|------------------------------------------------------------------------------------|--------|--------|
| 1418312_at   | Zfp276                                                                             | -0.034 | -0.423 |
| 1422524_at   | Abcb6                                                                              | -0.037 | -0.192 |
| 1426752_at   | Phf17                                                                              | -0.038 | 0.150  |
| 1452368_at   | Bcr                                                                                | -0.040 | -0.242 |
| 1421837_at   | Rps18                                                                              | -0.041 | 0.317  |
| 1424572_a_at | H2afy                                                                              | -0.044 | -0.147 |
| 1424090_at   | Sdcbp2                                                                             | -0.063 | -0.295 |
| 1426716_at   | Tdrd7                                                                              | -0.069 | -0.456 |
| 1422909_at   | Smc6l1                                                                             | -0.072 | 0.254  |
| 1460370_at   | Top1mt                                                                             | -0.074 | -0.188 |
| 1437712_x_at | Exosc4                                                                             | -0.074 | -0.222 |
| 1422437_at   |                                                                                    | -0.076 | -0.754 |
| 1425365_a_at | Cyp2d13                                                                            | -0.080 | -1.005 |
| 1452035_at   | Col4a1                                                                             | -0.081 | -0.487 |
| 1423075_at   | Lman2                                                                              | -0.082 | -0.387 |
| 1433467_at   | Slc7a6                                                                             | -0.083 | -0.391 |
| 1436542_at   | Ptger1                                                                             | -0.086 | -0.233 |
| 1451271_a_at | Acat1                                                                              | -0.088 | -0.212 |
| 1422579_at   | Hspe1                                                                              | -0.093 | -0.192 |
| 1422351_at   | Olf480                                                                             | -0.102 | -0.456 |
| 1416431_at   | Tubb6                                                                              | -0.104 | -0.558 |
| 1418430_at   | Kif5b                                                                              | -0.105 | -0.227 |
| 1432263_a_at | Cox7a2l                                                                            | -0.107 | 0.159  |
| 1423669_at   | Col1a1                                                                             | -0.108 | -0.510 |
| 1427495_at   | Scn7a                                                                              | -0.109 | 0.696  |
| 1452540_a_at | Hist1h2bc /// Hist1h2be /// Hist1h2bl ///<br>Hist1h2bm /// Hist1h2bp /// LOC432734 | -0.109 | -0.214 |
| 1416351_at   | Map2k1                                                                             | -0.110 | -0.243 |
| 1423771_at   | Prkcdp                                                                             | -0.111 | -0.407 |
| 1451057_x_at |                                                                                    | -0.119 | -0.086 |
| 1431274_a_at | Hspa9a                                                                             | -0.120 | 0.323  |
| 1416762_at   | S100a10                                                                            | -0.121 | -0.108 |
| 1452081_a_at | 9130017N09Rik                                                                      | -0.123 | -0.310 |
| 1427935_at   | 2610208E05Rik                                                                      | -0.123 | -0.210 |
| 1438477_a_at | Mcee                                                                               | -0.124 | -0.154 |
| 1451450_at   | 2010011I20Rik                                                                      | -0.125 | -0.128 |
| 1417143_at   | Edg2                                                                               | -0.126 | 0.098  |
| 1453033_at   | 2010003O02Rik                                                                      | -0.126 | 0.411  |
| 1460323_at   | Tars                                                                               | -0.127 | -0.228 |
| 1423617_at   | 2610019N19Rik                                                                      | -0.128 | -0.302 |
| 1423304_a_at | Rnf111                                                                             | -0.130 | 0.036  |
| 1451687_a_at |                                                                                    | -0.130 | -0.203 |
| 1416109_at   | Fuca1                                                                              | -0.134 | 0.031  |
| 1418177_at   | Gabrg2                                                                             | -0.137 | 0.546  |
| 1426912_at   | Rfwd2                                                                              | -0.139 | -0.392 |
| 1424303_at   | AV216087                                                                           | -0.139 | 0.551  |

|              |                 |        |        |
|--------------|-----------------|--------|--------|
| 1424408_at   | Lims2           | -0.140 | -0.405 |
| 1423505_at   | Tagln           | -0.141 | -0.240 |
| 1449517_at   | Qpctl           | -0.143 | -0.458 |
| 1430371_x_at | Eif2ak3         | -0.147 | 0.215  |
| 1453096_x_at | Rpl27           | -0.148 | -0.094 |
| 1435231_at   | Coq4            | -0.150 | -0.193 |
| 1416064_a_at | Hspa5           | -0.153 | -0.391 |
| 1449477_s_at | Slc2a10         | -0.153 | -0.354 |
| 1423099_a_at | Mettl3          | -0.155 | -0.227 |
| 1426793_a_at | Rpl14           | -0.159 | -0.098 |
| 1417259_a_at | Capzb           | -0.171 | -0.139 |
| 1417947_at   | Pcna            | -0.174 | -0.200 |
| 1448861_at   | Traf5           | -0.175 | -0.312 |
| 1453030_at   | Rnf184          | -0.182 | -0.282 |
| 1431422_a_at | Dusp14          | -0.186 | -0.217 |
| 1450120_at   | Scn1a           | -0.191 | -0.236 |
| 1420455_at   | Gcm2            | -0.217 | -0.350 |
| 1460639_a_at | Atox1           | -0.222 | 0.005  |
| 1420451_at   | Accn5           | -0.230 | 0.579  |
| 1423642_at   | 4930542G03Rik   | -0.230 | -0.178 |
| 1452249_at   | Prickle1        | -0.241 | -0.171 |
| 1417189_at   | Psme2           | -0.242 | -0.220 |
| 1447961_s_at | Mrpl38          | -0.243 | -0.410 |
| 1423895_a_at | Cugbp2          | -0.243 | 0.268  |
| 1453722_s_at | Sfrs1           | -0.244 | -0.236 |
| 1427209_at   | Baz2a           | -0.245 | -0.490 |
| 1429294_at   | Trip13          | -0.245 | -0.442 |
| 1427532_at   | Tcrim           | -0.250 | 0.245  |
| 1424409_at   | Cldn23          | -0.253 | -0.297 |
| 1420992_at   | Ankrd1          | -0.256 | -0.717 |
| 1448961_at   | Plscr2          | -0.262 | 0.219  |
| 1452279_at   | Pfc             | -0.264 | -0.027 |
| 1416827_at   | Tbxas1          | -0.266 | -0.532 |
| 1437589_x_at | 2810038K19Rik   | -0.267 | -0.268 |
| 1448186_at   | <b>Pnliprp2</b> | -0.267 | -1.295 |
| 1424693_at   | 4933407N01Rik   | -0.278 | -0.516 |
| 1422380_at   | V1rb5           | -0.280 | -0.135 |
| 1417381_at   | C1qa            | -0.283 | -0.022 |
| 1420875_at   |                 | -0.286 | -0.122 |
| 1426871_at   | Fbxo33          | -0.306 | 0.005  |
| 1426292_at   | 6330581L23Rik   | -0.308 | -0.499 |
| 1434033_at   | Tle1            | -0.309 | -0.459 |
| 1423587_a_at | Exosc10         | -0.313 | -0.443 |
| 1415861_at   | Tyrp1           | -0.319 | 0.075  |
| 1428580_at   | Blvra           | -0.331 | -0.190 |
| 1419035_s_at | Csnk2a1         | -0.333 | -0.053 |



|              |                                              |        |        |
|--------------|----------------------------------------------|--------|--------|
| 1448925_at   | Twist2                                       | -0.338 | -0.036 |
| 1425719_a_at | Nmi                                          | -0.367 | -0.154 |
| 1450933_at   | Pde7a                                        | -0.368 | -0.057 |
| 1451781_at   | Nfatc2ip                                     | -0.370 | -0.052 |
| 1421775_at   | Fcer1a                                       | -0.384 | 0.080  |
| 1416856_at   | 3230401D17Rik                                | -0.389 | 0.058  |
| 1417804_at   | Rasgrp2                                      | -0.392 | -0.319 |
| 1452348_s_at |                                              | -0.398 | 0.110  |
| 1453913_a_at | Tap2                                         | -0.401 | -0.279 |
| 1426147_s_at | Cldn10                                       | -0.401 | 0.404  |
| 1442344_at   |                                              | -0.402 | -0.145 |
| 1418950_at   | Drd2                                         | -0.406 | -0.343 |
| 1453184_at   | 2310040C09Rik                                | -0.412 | -0.417 |
| 1425644_at   | Lepr                                         | -0.418 | 0.725  |
| 1431395_a_at | Iqgap1                                       | -0.422 | -0.267 |
| 1427987_at   | Safb2                                        | -0.423 | -0.164 |
| 1452432_at   | Tfpi                                         | -0.428 | -0.090 |
| 1425396_a_at | Lck                                          | -0.432 | -0.111 |
| 1422611_s_at | Igf2bp3                                      | -0.433 | -0.073 |
| 1448511_at   | Ptprcap                                      | -0.433 | 0.083  |
| 1453865_a_at | DXImx46e                                     | -0.436 | -0.360 |
| 1429247_at   | Anxa6                                        | -0.459 | -0.155 |
| 1448160_at   | Lcp1                                         | -0.478 | -0.223 |
| 1435477_s_at | Fcgr2b                                       | -0.498 | -0.113 |
| 1450361_at   | Prop1                                        | -0.552 | 0.010  |
| 1422904_at   | Fmo2                                         | -0.577 | 0.683  |
| 1426589_at   | Gab3                                         | -0.621 | -0.042 |
| 1417620_at   | Rac2                                         | -0.650 | -0.493 |
| 1453086_at   | 6330408A02Rik                                | -0.669 | -0.620 |
| 1418194_at   | Galnt10                                      | -0.698 | -0.503 |
| 1423562_at   | ORF31                                        | -0.700 | -0.544 |
| 1420464_s_at | Pira1 /// Pira3 /// Pira4 /// Pira6 /// Pirb | -0.716 | -0.023 |
| 1420577_at   | Aicda                                        | -0.761 | -0.492 |
| 1425156_at   | 9830147J24Rik                                | -0.769 | -0.657 |
| 1427503_at   | AI324046                                     | -0.771 | -1.470 |
| 1450118_a_at | Tnnt3                                        | -0.777 | -0.743 |
| 1420819_at   |                                              | -0.807 | 0.160  |
| 1419192_at   | Il4i1                                        | -0.809 | -0.689 |
| 1425178_s_at | Shmt1                                        | -0.823 | -0.380 |
| 1427351_s_at | Igh-6                                        | -0.841 | -1.319 |
| 1425179_at   | Shmt1                                        | -0.915 | -0.245 |
| 1419762_at   | Ubd                                          | -0.931 | -0.180 |
| 1448562_at   | <b>Upp1</b>                                  | -0.946 | -0.412 |
| 1448479_at   | <b>Psm3</b>                                  | -0.967 | -0.814 |
| 1449475_at   | Atp12a                                       | -0.972 | -0.090 |
| 1419178_at   | Cd3g                                         | -1.011 | -0.226 |

|            |                 |        |        |
|------------|-----------------|--------|--------|
| 1417995_at | Ptpn22          | -1.175 | -0.469 |
| 1425233_at | 2210407C18Rik   | -1.227 | -0.514 |
| 1423467_at | Ms4a4b          | -1.342 | -0.431 |
| 1435865_at | <b>Hist3h2a</b> | -1.604 | -0.221 |
| 1419060_at | Gzmb            | -1.954 | -0.815 |
| 1425177_at | Shmt1           | -2.271 | -0.957 |
| 1460629_at |                 | -3.630 | -0.655 |

**Table S2. Quantitative RT-PCR verification of the microarray analysis.** Nine genes were selected from the microarray results to be tested for changes in gene expression by quantitative RT-PCR. The gene tested, Affymetrix identification number, primer sequences, and universal probe library numbers are indicated.

| <b>Gene</b> | <b>Affymetrix ID</b> | <b>Primer1</b>           | <b>Primer2</b>         | <b>Universal Probe Library No.</b> |
|-------------|----------------------|--------------------------|------------------------|------------------------------------|
| Tiam1       | 1453887_a_at         | ggaatatttgatgacactgttcca | tggacactgggtaagaccact  | 7                                  |
| Yif1        | 1456134_x_at         | accattcggcatatggagtc     | tgtatcatcgaagagtggagga | 50                                 |
| Cdc20       | 1439377_x_at         | acatcaaggcgtgtcaag       | aatgtgccggtcactggt     | 63                                 |
| Upp1        | 1448562_at           | catcaccatcatccgcatt      | ctgcgtgatgacaacagagc   | 50                                 |
| Psm3        | 1448479_at           | gatgaacagcaagcgtaca      | gcggtctgagtgtgatct     | 98                                 |
| Hist3h2a    | 1435865_at           | tggagggaggtgtactaggg     | ttggtagtggtgtgcatt     | 66                                 |
| Tuba6       | 1448232_x_at         | gttttcgaggaccacttc       | attgccgatctggacacc     | 58                                 |
| Cnm3        | 1420483_at           | tctcaacgataccaactggac    | aatggccaggtgggactt     | 25                                 |
| Pnliprp2    | 1448186_at           | cacaaacgagaatccaacaac    | aagttggaagcattgatggtg  | 53                                 |

1. R. Edgar, M. Domrachev, A. E. Lash, *Nucleic Acids Res* **30**, 207 (Jan 1, 2002).
